# Supplementary material for: Number of natural teeth, denture use and mortality in Chinese elderly: a population-based prospective cohort study
Source: Springer Nature journal article supplement (doi:10.1186/s12903-020-01084-9), 2020-04-10

**Figure S1.** Flowchart of participant enrollment

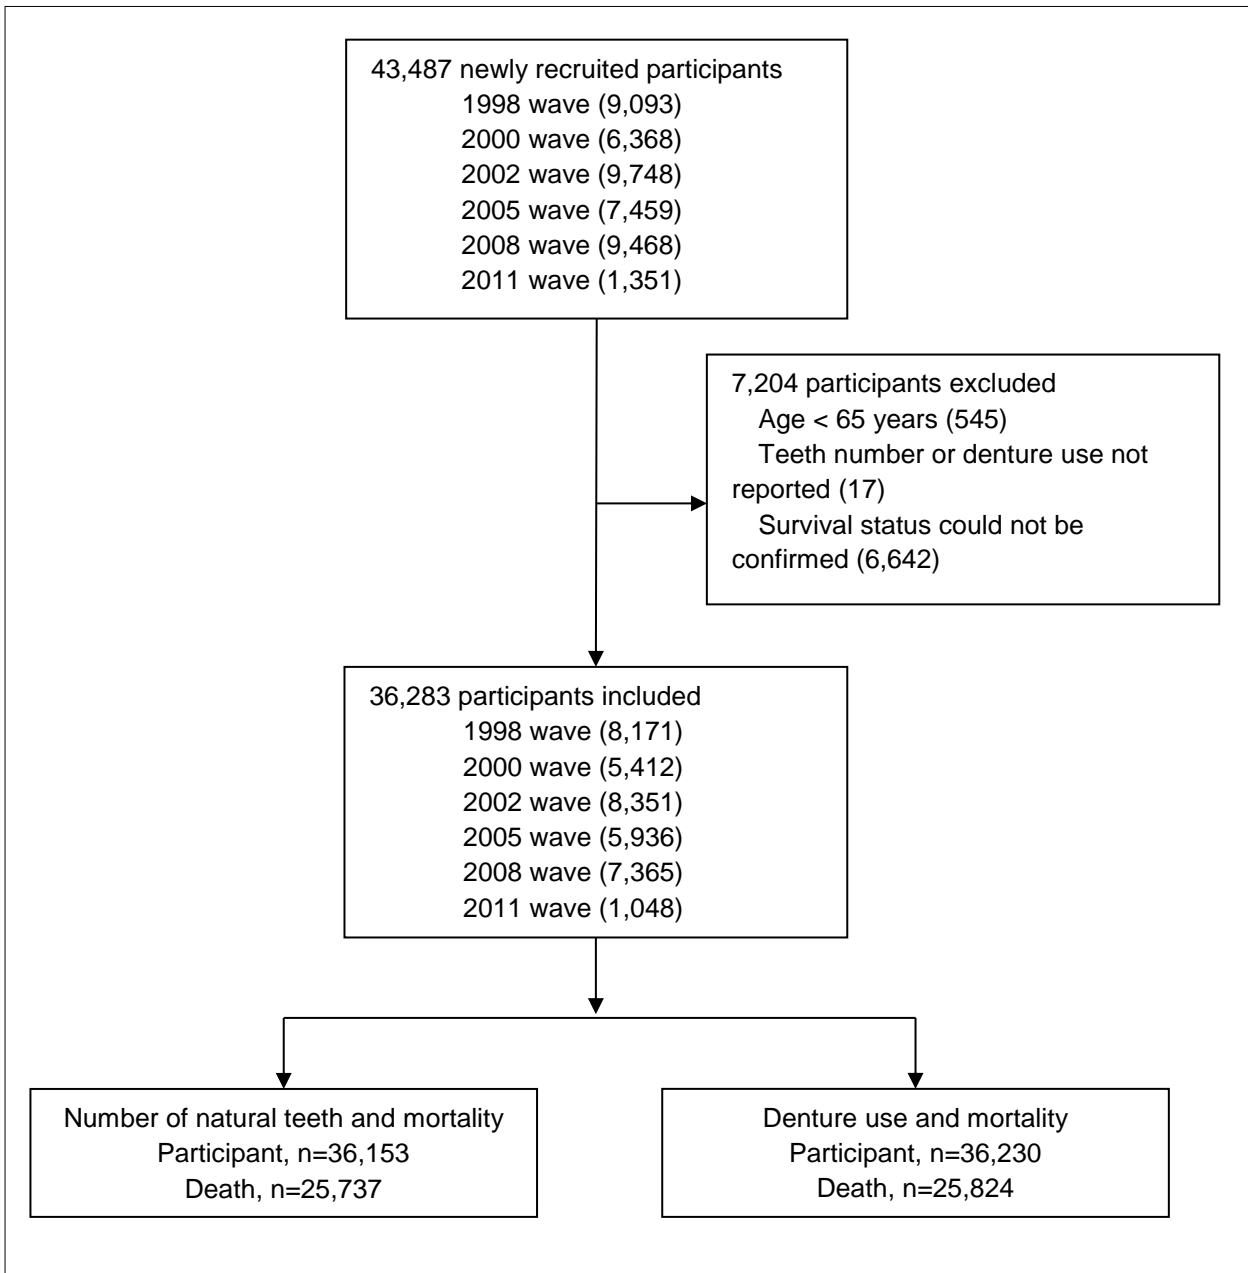

Supplement: MOESM1 [file 17885604]
